# Supplementary material for: Persistent Mesodermal Differentiation Capability of Bone Marrow MSCs Isolated from Aging Patients with Low-Energy Traumatic Hip Fracture and Osteoporosis: A Clinical Evidence
Source: MDPI journal article supplement (doi:10.3390/ijms25105273), 2024-05-12
Supplement: s1 [file s1]

## Supplementary information

**Table S1.** Clinical information and bone marrow samples of patients enrolled in the current study.

|                            | <b>Case 1</b> | <b>Case 2</b>           | <b>Case 3</b> | <b>Case 4</b>      | <b>Case 5</b> | <b>Case 6</b>         | <b>Case 7</b> |
|----------------------------|---------------|-------------------------|---------------|--------------------|---------------|-----------------------|---------------|
| <b>Sample code</b>         | OP-001        | OP-002                  | OP-003        | OP-004             | OP-005        | OP-006                | OP-007        |
| <b>Extraction date</b>     | 2019.5.16     | 2019.5.31               | 2019.7.3      | 2019.7.25          | 2019.7.30     | 2019.9.19             | 2019.10.8     |
| <b>Pathogen</b>            | Pass          | pass                    | pass          | pass               | HBVs:+        | -                     | Anti-HCV:+    |
| <b>BM vol.</b>             | 40ml          | 27ml                    | 40ml          | 25ml               | 35ml          | -                     | 27.5ml        |
| <b>Extraction site</b>     | L. Hip        | R. Hip                  | R. Hip        | L. Hip             | R. Hip        | L. Hip<br>(terminate) | L. Hip        |
| <b>Age</b>                 | 95            | 79                      | 76            | 83                 | 73            | 67                    | 85            |
| <b>Gender</b>              | M             | F                       | F             | F                  | F             | F                     | M             |
| <b>Fracture times/site</b> | 1<br>(L)FNF   | 2<br>(L)FNF<br>->(R)ITF | 2             | 1<br>(L)hip<br>ITF | 1             | -                     | 1             |

|                              | <b>Case 8</b> | <b>Case 9</b> | <b>Case 10</b>           | <b>Case 11</b> | <b>Case 12</b> | <b>Case 13</b> | <b>Case 14</b> |
|------------------------------|---------------|---------------|--------------------------|----------------|----------------|----------------|----------------|
| <b>Sample code</b>           | OP-008        | OP-009        | OP-010                   | OP-011         | OP-012         | OP-013         | OP-014         |
| <b>Extraction date</b>       | 2019.10.24    | 2019.11.8     | 2019.12.13               | 2020.2.13      | 2020.3.30      | 2020.4.14      | 2020.4.29      |
| <b>Pathogen</b>              | Anti-HCV:+    | pass          | pass                     | Anti-HCV:+     | pass           | pass           | pass           |
| <b>BM vol.</b>               | 27.5ml        | ~25ml         | 23ml                     | ~45ml          | ~25ml          | ~37.5ml        | ~35ml          |
| <b>Extraction site</b>       | R. Hip        | L. Hip        | L. Hip                   | L. Hip         | L. Hip         | L. Hip         | R. Hip         |
| <b>Age</b>                   | 85            | 56            | 77                       | 97             | 90             | 90             | 72             |
| <b>Gender</b>                | F             | F             | M                        | F              | M              | F              | M              |
| <b>Fracture times / site</b> | 1             | 1<br>(L)FNF   | 2<br>(R)ITF<br>-> (L)ITF | 1              | 1              | 1              | 1              |

|                            | <b>Case 15</b> | <b>Case 16</b> | <b>Case 17</b> | <b>Case 18</b> | <b>Case 19</b> |
|----------------------------|----------------|----------------|----------------|----------------|----------------|
| <b>Sample code</b>         | OP-015         | OP-016         | OP-017         | OP-018         | OP-019         |
| <b>Extraction date</b>     | 2020.5.13      | 2020.5.19      | 2020.6.12      | 2020.6.30      | 2020.9.15      |
| <b>Pathogen</b>            | HBVs:+         | Pass           | pass           | pass           | pass           |
| <b>BM vol.</b>             | ~40ml.         | ~42ml          | ~40ml          | 35ml           | ~50ml          |
| <b>Extraction site</b>     | L. Hip         | L. Hip         | L. Hip         | R. Hip         | R. Hip         |
| <b>Age</b>                 | 57             | 75             | 89             | 85             | 92             |
| <b>Gender</b>              | F              | F              | F              | M              | F              |
| <b>Fracture times/site</b> | 1              | 1              | 1              | 1              | 1              |

**Table S2.** Details of BMSCs collected from patients enrolled in the current study and patients' disease background

| Sample   | Age (gender) | BMI   | Disease history                                                                                | Pre-surgery Hb | Diagnosis | Surgery | BM collection date | BMD date                 | BMD (L-spine) | BMD (FN)                 |
|----------|--------------|-------|------------------------------------------------------------------------------------------------|----------------|-----------|---------|--------------------|--------------------------|---------------|--------------------------|
| OP-001   | 95 (M)       | 19.72 | L1,L3 compression fx<br>HTN, arrhythmia                                                        | 13.8           | Lt FNF    | bipolar | 2019.05.16         | 2019.07.12               | +1.9          | Rt FN -1.8               |
| OP-002   | 78 (F)       | 23.56 | Lt FN s/p bipolar<br>(2018.11.29)<br>HTN, s/p thyroidectomy<br>Osteoporosis under<br>denosumab | 11.2           | Rt ITF    | ORIF    | 2019.05.31         | 2018.12.26               | -3.1          | Rt FN -3.1               |
| OP-003   | 76 (F)       | 23.11 | HTN<br>L-spine s/p                                                                             | 12.1           | Rt FNF    | bipolar | 2019.07.03         | -                        |               |                          |
| OP-004   | 83 (F)       | 23.50 | DM, HTN, thalassemia<br>Osteoporosis (bonviva)                                                 | 8.9            | Lt ITF    | ORIF    | 2019.07.25         | 2014.10.20<br>2020.07.29 | -3.7<br>-4.7  | Rt FN -3.1<br>Rt FN -4.4 |
| OP-009   | 56 (F)       | 19.47 | Depression, nursing home<br>anemia                                                             | 9.6            | Lt FNF    | bipolar | 2019.11.06         | 2019.12.06               | -2.5          | Rt FN -2.9               |
| OP-010   | 77 (M)       | 22.31 | Osteoporosis under<br>Bonviva<br>Rt ITF s/p (2018.08.17)<br>Smoking(+)                         | 12.6           | Lt ITF    | ORIF    | 2019.12.13         | 2018.10.24               | -0.0          | Lt Thip -2.7             |
| OP-014   | 72 (M)       | 23.60 | HTN, DM<br>L1 wedge deformity<br>Smoking (+)                                                   | 14.8           | Rt ITF    | ORIF    | 2020.04.28         | -                        |               |                          |
| OP-016   | 75 (F)       | 20.55 | T11 compression fx                                                                             | 9.6            | Lt FNF    | bipolar | 2020.05.18         | -                        |               |                          |
| OP-017   | 89 (F)       | 19.65 | dementia                                                                                       | 13.2           | Lt FNF    | bipolar | 2020.06.12         | 2020.06.15               | -1.8          | Rt FN -4.3               |
| OP-018   | 85 (M)       | 22.52 | T12/L1 compression fx<br>HTN<br>Smoking (-)                                                    | 12.9           | Rt FNF    | bipolar | 2020.06.29         | 2020.07.03               | 0.6           | Lt FN -2.4               |
| OP-019   | 92 (F)       | 20.44 | DM, HTN, Alzheimer dz                                                                          | 10.0           | Rt ITF    | ORIF    | 2020.09.14         | 2020.09.17               | -2.4          | Lt FN -3.8               |
|          |              |       |                                                                                                |                |           |         |                    |                          |               |                          |
| THCTB006 | 21 (M)       |       | Smoking                                                                                        |                | Rt FSF    |         | 2017.01.11         |                          |               |                          |
| THCTB008 | 22 (M)       |       | HCV(+), smoking                                                                                |                | Rt FSF    |         | 2017.04.08         |                          |               |                          |
| T2B-007  | 24 (M)       |       |                                                                                                |                | Rt FSF    |         | 2018.12.20         |                          |               |                          |

Abbreviation: not determined (nd), fixation (fx), hypertension (HTN).

**Table S3.** Details of BMSCs collected from the young, healthy donors

|                              | <b>Case 1</b>                           | <b>Case 2</b>                           | <b>Case 3</b>                           |
|------------------------------|-----------------------------------------|-----------------------------------------|-----------------------------------------|
| <b>Sample code</b>           | THCTB-006                               | THCTB-008                               | T2B-007                                 |
| <b>Extraction date</b>       | 2017.01.11                              | 2017.04.08                              | 2018.12.20                              |
| <b>Pathogen</b>              | Pass                                    | pass                                    | pass                                    |
| <b>BM vol.</b>               | 40 ml                                   | 40 ml                                   | 40 ml                                   |
| <b>Extraction site</b>       | R. femur                                | R. femur                                | R. femur                                |
| <b>Age</b>                   | 21                                      | 22                                      | 24                                      |
| <b>Gender</b>                | M                                       | M                                       | M                                       |
| <b>Fracture times / site</b> | 1<br>(R)femur fracture, car<br>accident | 1<br>(R)femur fracture, car<br>accident | 1<br>(R)femur fracture, car<br>accident |
| <b>Note</b>                  | Smoking                                 | Smoking                                 | -                                       |

**Table S4.** Details of selected primary antibodies and isotypes for FACS analysis.

| <b>Antibody name</b>  | <b>Clone</b> | <b>Description</b> | <b>Cat no</b> | <b>Lot no</b> | <b>Brand</b>     |
|-----------------------|--------------|--------------------|---------------|---------------|------------------|
| HLA-DR-FITC           | G46-6        | Mouse IgG2a        | 555811        | 1103331       | BD<br>Pharmingen |
| CD14-FITC             | M5E2         | Mouse IgG2a        | 555397        | 0357884       | BD<br>Pharmingen |
| Isotype-FITC          | IgG2a        | Mouse IgG2ak       | 555573        | 1144955       | BD<br>Pharmingen |
| HLA-ABC-FITC          | G46-2.6      | Mouse<br>IgG1      | 555552        | 9105740       | BD<br>Pharmingen |
| CD45-FITC             | HI30         | Mouse IgG1         | 555482        | 1285678       | BD<br>Pharmingen |
| CD19-FITC             | HIB19        | Mouse IgG1         | 555412        | 9308489       | BD<br>Pharmingen |
| CD105-FITC            | SN6          | Mouse IgG1         | MCA1557F      | 158807        | Bio-Rad          |
| Isotype-FITC          | MOPC-21      | Mouse IgG1         | 555748        | 1054855       | BD<br>Pharmingen |
| CD34-PE               | 581          | Mouse IgG1         | 555822        | 0128396       | BD Pharmingen    |
| CD90-PE<br>conjugated | 5E10         | Mouse IgG1,kappa   | 555596        | 2026304       | BD<br>Pharmingen |
| CD73-PE               | AD2          | Mouse IgG1,kappa   | 550257        | 1075157       | BD<br>Pharmingen |
| Isotype -PE           | MOPC-21      | Mouse IgG1         | 555749        | 8242609       | BD<br>Pharmingen |

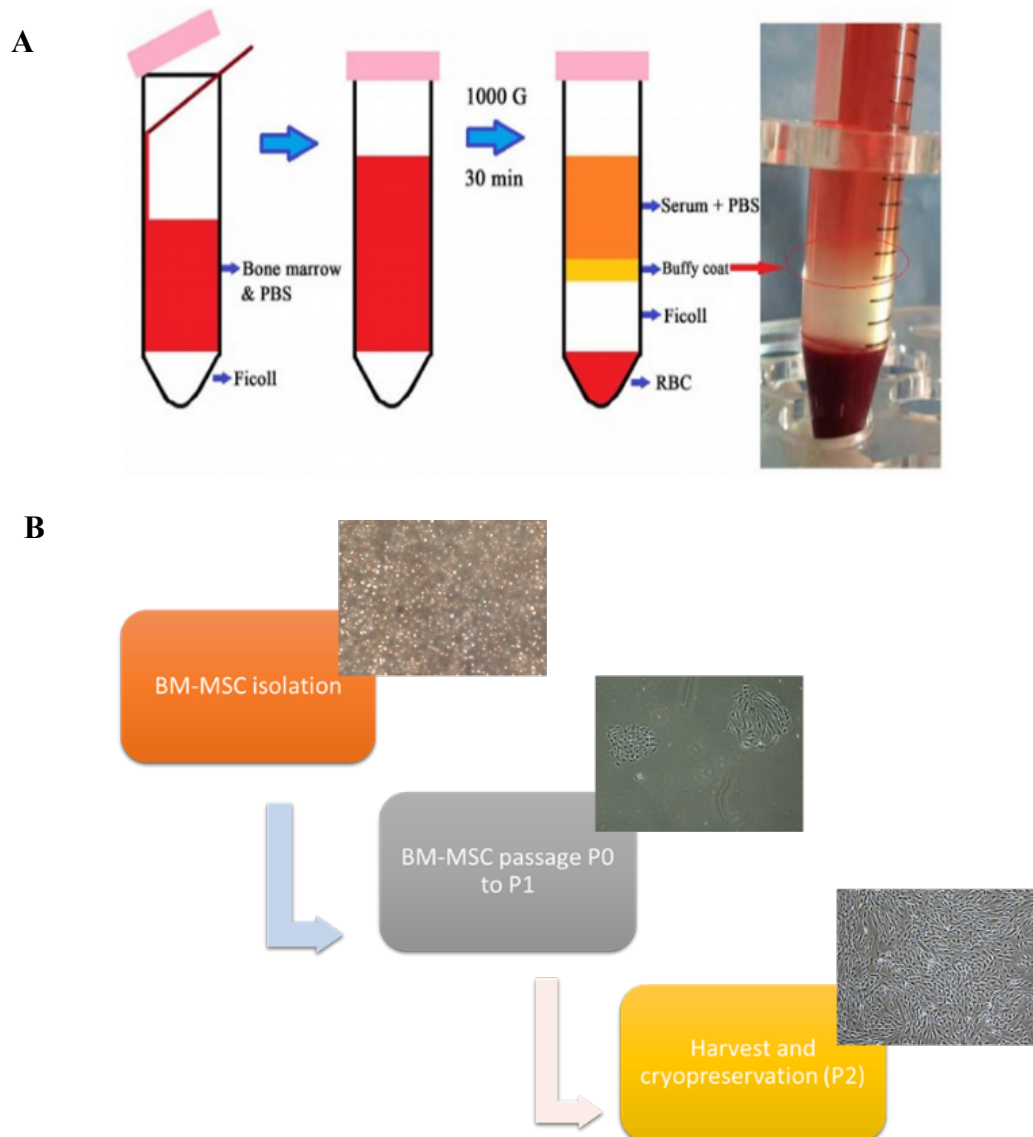

**Figure S1.** Isolation of bone marrow stem cells by Ficoll gradient centrifugation. **A** Ficoll gradient centrifugation was conducted in 4 °C. **B** Cells in the buffy coat layer were further collected, counted, and plated in the culture dish using  $\alpha$ -MEM containing 10% FBS and the P2 BMSCs were cryo-preserved for subsequent experiments.



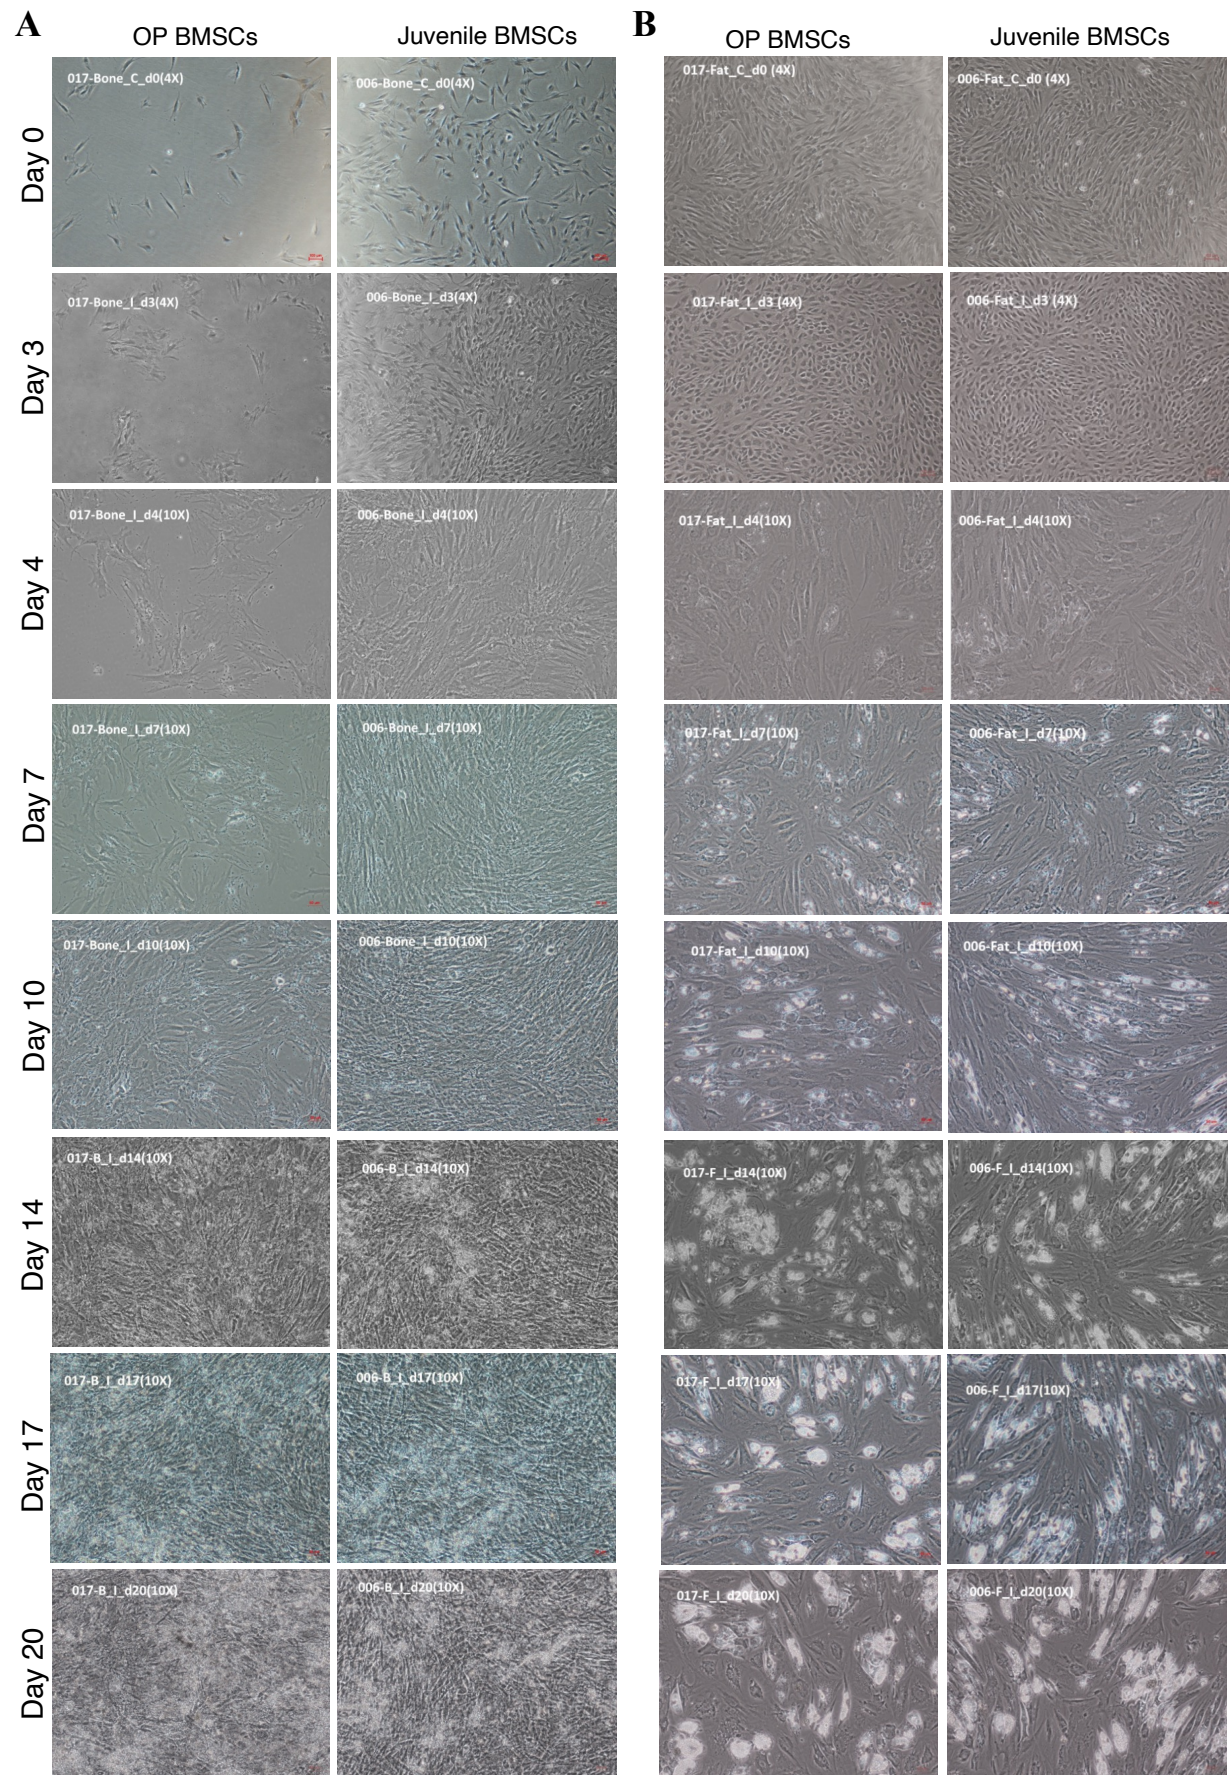

**Figure S2.** Representative images examined the longitudinal cultivation of the osteogenic and adipogenic differentiation capability of BMSCs retrieved from OP patients and healthy donors. **A** osteogenic differentiation. **B** adipogenic differentiation. Bright-field images. Magnification: 100×.
